# Supplementary material for: Oligo- and dsDNA-mediated genome editing using a tetA dual selection system in Escherichia coli
Source: PLOS journal article supplement (doi:10.1371/journal.pone.0181501), 2017-07-18
Supplement: S3 (10.1371/journal.pone.0181501.s003) [file journal.pone.0181501.s003]

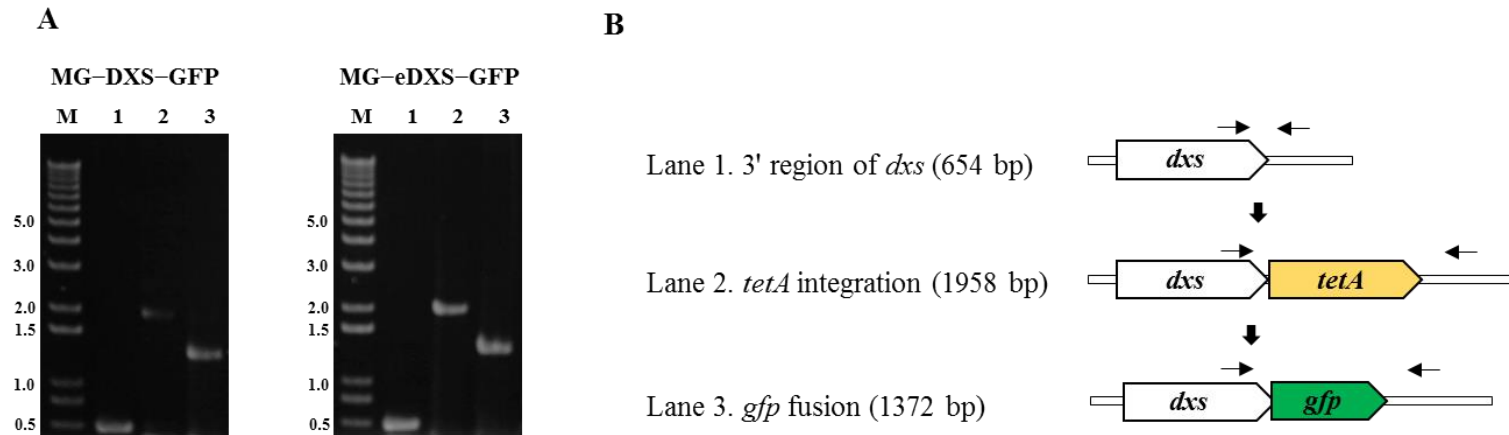

**S3 Fig. Gene insertion using dsDNA-homologous recombination.** (A) Agarose gel electrophoresis of the PCR products following the insertion of *gfp* downstream of *dxs* (B) Steps and primers (*dxs*-seqF2 and *dxs*-seqR2) used to confirm recombination. The size of specific PCR products is given in parentheses.
